# Supplementary material for: High density cellulose nanofibril assembly leads to upgraded enzymatic and chemical catalysis of fermentable sugars, cellulose nanocrystals and cellulase production by precisely engineering cellulose synthase complexes
Source: Royal Society of Chemistry journal article supplement (doi:10.1039/d2gc03744k), 2023-01-01
Supplement: d2gc03744k1.pdf [file d2gc03744k1.pdf]

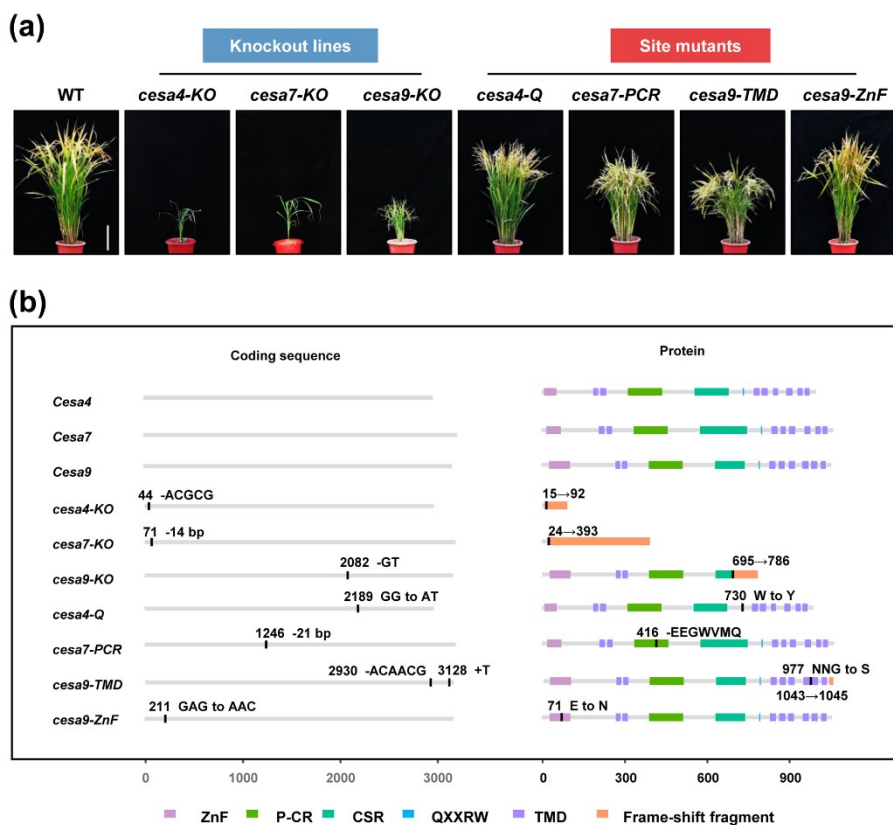

**Fig. S1. Phenotypes and genetic information of site-mutants and knockout lines of OsCESA4,7,9 isoforms. (a) Rice phenotypes at the mature stage. (b) Genetic information of mutation sites in coding sequence and corresponding protein.**

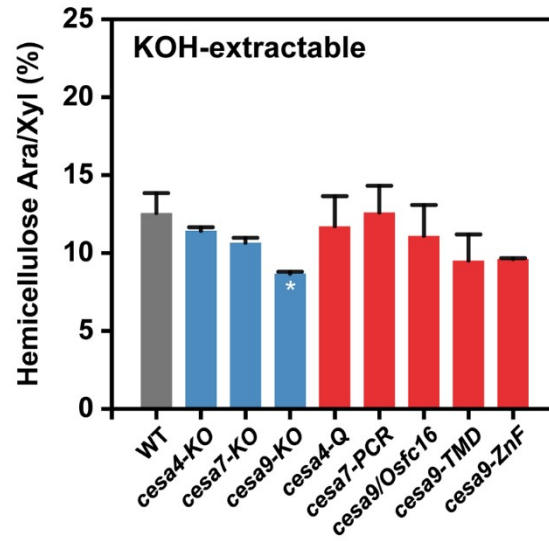

**Fig. S2. The ratio of arabinose to xylose of KOH-extractable hemicelluloses of site-mutants and knockout lines of OsCESA4,7,9 isoforms.** Data as means  $\pm$  SD ( $n = 3$ ); Significant differences between the WT and mutant were determined using two-tailed Student's t-test:  $**P < 0.01$ ,  $*P < 0.05$ .

**Table S1.** Primers used for CRISPR-Cas9 editing of OsCESA4, 7, 9 isoforms.

| Mutant           | Vector   | sgRNA oligonucleotides                                                                                                                                                                                 | Mutation screening                               |
|------------------|----------|--------------------------------------------------------------------------------------------------------------------------------------------------------------------------------------------------------|--------------------------------------------------|
| <i>cesa4-KO</i>  | pCSGAPO1 | TGTGTGTGCGCGTCGTCCCCGCACG<br>AAACCGTGCGGGGACGACGCGCACA                                                                                                                                                 | GTTCCATGTCCGCTCAACCTT<br>TGCTTACCACTCCCAACTCC    |
| <i>cesa7-KO</i>  | pCSGAPO1 | TGTGTGCCACCTCCTCGCCGCACACC<br>AAACGGTGTGCGGCGAGGAGGTGGCA                                                                                                                                               | CCTGCATCTGATCATCAACCAGC<br>CTTGGTGGGGCTCTTGATCTG |
| <i>cesa9-KO</i>  | pRGEB32  | GGCATGAACTTCGAGAAGCGGTTTC<br>AAACGAACCGCTTCTCGAAGTTCA                                                                                                                                                  | CGCTGTACGGATAACAACCCAC<br>GACCCGTAGATCCACCCAG    |
| <i>cesa4-Q</i>   | pCSGAPO1 | TGTGTGAGCCCACCGGAGAACCTGG<br>AAACCCAGGTTCTCCGGTGGGCTCA                                                                                                                                                 | TCCGCAAACCCATCTACT<br>CACCGATGACCCAGAACTGC       |
| <i>cesa7-PCR</i> | pRGEB32  | GGCATGCATCACCCACCCTTCCTC<br>AAACGAGGAAGGGTGGGTGATGCA                                                                                                                                                   | TTGGAGCATCTCGTGATCAGT<br>ATCGTTAGCTCACGTCACGG    |
| <i>cesa9-TMD</i> | pRGEB32  | TAGGTCTCCAGCCGTTGTTGAGTTTTAGAGCTAGAA (target 1)<br>ATGGTCTCAGGCTCCGAGGCGTGACCAGCCGGGAA (target 1)<br>TAGGTCTCCCATCAAGGCCAGTTTTAGAGCTAGAA (target 2)<br>ATGGTCTCAATGGTGAAGGGATGCACCAGCCGGGAA (target 2) | CGGGATCGACACCAACTTCA<br>ATGGCCATCTGTCCATTCCC     |
| <i>cesa9-ZnF</i> | pCSGAPO1 | TGTGTGGCGCTCGTACTCGTAGCAG<br>AAACCTGCTACGAGTACGAGCGCCA                                                                                                                                                 | CCATATAGCCCCTGCCACAA<br>CCTCCCGTAGCTCATCTTGC     |

**Table S2.** Primers used for detection of off-target mutagenesis in *CESA*-edited plants.

| Sample          | Target site             | Potential off-target site | Location        | PCR primer                                    |
|-----------------|-------------------------|---------------------------|-----------------|-----------------------------------------------|
| <i>cesa4-KO</i> | GTGCGCGTCGTCCCCGCACGCGG | CTGGGCGTGGTGCCCCGCACGAGG  | Chr6:+22001840  | CGCGGATGGAGATGATGTGA<br>TCCGAGGTAGGCCATTCTGT  |
|                 |                         | GTGCGCGCCGTCCCAGCACACGG   | Chr6:-1573708   | TGATGATGGACGGACAGACA<br>GACTACGACTACGGCTG     |
|                 |                         | GCGCGCGACGTGCCGGCACGCGG   | Chr9:-22046877  | GAACACGCGGAAAATGCTGT<br>CACTCATCTGTGCTGGGTCC  |
|                 |                         | GGTGGCGTCGTCCGCGCACGGGG   | Chr1:-37789455  | ATGAAAGGCTCACCAGGTCTG<br>CCCATGTCCATCACGGTCAA |
|                 |                         | CAGCGCGTCGTCGCCGTACGGGG   | Chr5:+29485019  | AAGAAGGCAATGGAGCGGAA<br>GCCACCAGGGTCGAATTGAT  |
|                 |                         | GGGCGGCTCGTCCCCGCAGGAGG   | Chr7:+7757629   | CGGCGTGGCTTCACCTTC<br>CGCTTCGCTCCTTCTCT       |
|                 |                         | GTGCGCCTCGTCCTCGCACTAGG   | Chr11:+12133769 | ACAAGCTGAAGTACACGT<br>AGGCAATCACAGACAATC      |
| <i>cesa7-KO</i> | CCACCTCCTCGCCGCACACCCGG | CTGCGTCCTCACCGCACACCTGG   | Chr8:-23134438  | GCCGATACCAAGGAGGTACG<br>AAAAGTCGTGGCCTCATGCT  |
|                 |                         | CGGCCTCCTCGCCGCCACCCGG    | Chr2:-27804497  | GAGCCACCTGCAGAACATCT<br>AGTTCAAAAATGTCCGCGCC  |

|                 |                         |                         |                 |                                               |
|-----------------|-------------------------|-------------------------|-----------------|-----------------------------------------------|
|                 |                         | CGGCCTCCTCGCCGCCACCCGG  | Chr4:-29195964  | CTTCTTCCCGGACAACCTCC<br>GCGACATTACTCCCCTGGAC  |
|                 |                         | CCGCATCCTCGCCGCGCACCCGG | Chr4:-7256358   | TGATGACGCACATCTACGGG<br>GGATCTCGCCACGATGAACT  |
|                 |                         | CCGACGGCTCGCCGCACACCAGG | Chr9:-21819639  | CGTTCCTCCAGGTGTTCCCTC<br>AACTTGTCCGGCGACTTCAT |
|                 |                         | CCACCTCGGCGCCGTACACCAGG | Chr1:-16285405  | GGTGAACGCTTGAAACTC<br>TCATTACGGACAACGGCA      |
| <i>cesa9-KO</i> | TGAACTTCGAGAAGCGGTTCCGG | TGAAATTGGAGAAACGGTTCAGG | Chr11:+28132545 | ACGCTCCTAGCTACCACGTA<br>CTGGGACAGGGCAGAGAAAG  |
|                 |                         | TGAGCTTCGCGCAGCGGTTTCGG | Chr3:+3655081   | GGTGCCTGTAGTCGGAGATG<br>CCGTGTCTCCTGTGGTCAA   |
|                 |                         | TGGACTGGGAGAAGCGGTACCGG | Chr1:+38116186  | TGTGGCCGTGAAGCAACTAT<br>CATCCGCGAGATGGTTGAGA  |
|                 |                         | AGAACTTCGAGCAGCGGTGGAGG | Chr2:+1064032   | ATGTACACGCAGCACCAGAA<br>CAGAGTCCACTGACCGGAAC  |
|                 |                         | AGAACTTCGACGAGCGGCTCCGG | Chr8:+25494609  | GCTCAACTGCATCCTCGACT<br>GACATACCGACGAGAGGCAC  |
|                 |                         | AGAACGGCGAGAAGCGGCTCCGG | Chr2:+13369089  | GCGGGTGGTGATACCAAGAT<br>TAGTTGGACAGCTTGCGGAG  |

|                             |                         |                         |                 |                                                |
|-----------------------------|-------------------------|-------------------------|-----------------|------------------------------------------------|
|                             |                         | TGCACTTGGAGCAGCTGTTCAGG | Chr5:+13625425  | GAGGACCCCTGTGGACAATG<br>AGGCCTTTACCCATCGCATC   |
| <i>cesa4<sub>Q</sub></i>    | GAGCCCACCGGAGAACCTGGTGG | GACCCCCTGGGAGAACCTGGGGG | Chr10:-4568506  | TTCCACACCGAGAACGAC<br>AGCAAAACCCAAAAACCT       |
|                             |                         | TCGCCCACCGGAGCACCTGGTGG | Chr12:+22604011 | AGGGTGATGACGAGGAGGAA<br>GGCGTGATCTCCTGCTTCTA   |
|                             |                         | GAGACCACCGGAGAACTTCGAGG | Chr12:-8036153  | GAGCTGAACGTTCTCCACC<br>CAAGAGGCAGAAAACACGGC    |
|                             |                         | TGGCCCATCGGAGGACCTGGTGG | Chr10:-23065051 | TGAGGAAGGTGACGTTGAGC<br>CGAGCTTCTGATCGACTCC    |
|                             |                         | CCGCCCAGCGGAGCACCTGGTGG | Chr10:+10181413 | TTCCGCCACCACTCACCC<br>CGCCGTTCTAGCCTCCG        |
|                             |                         | TAGCCATCCGGACAACCTGGAGG | Chr11:-17513749 | TGAAAGGTACAAGCCCTCACA<br>TGCTTTGTGCAGGCAACGAT  |
| <i>cesa7<sub>P-CR</sub></i> | TGCATCACCCACCCTTCCTCCGG | TGCATAATCCAGCCTTCCTCAGG | Chr1:-31425473  | TCTCTACTCCAAGTGGCAACC<br>TCACTTGCGGAAACAGCAGA  |
|                             |                         | TCCTGGACCCACCCTTCCTCCGG | Chr3:+3549793   | CCACATCATTCAACCGGGGA<br>CCGCCGAATGAGATCAAGA    |
|                             |                         | AGCAGCACCGGCCCTTCCTCCGG | Chr1:+14745236  | CCCAGAGGTTGAGGAAGTCG<br>AGGTTCACTTCTGGATTTCTGA |

|                            |                                       |                         |                |                                               |
|----------------------------|---------------------------------------|-------------------------|----------------|-----------------------------------------------|
|                            |                                       | AGCTTCATCCACCCCTCCTCCGG | Chr6:-28488169 | TCAGGTCCTCCTCCGACTG<br>AACCTTGCCCTATTGGTGGG   |
|                            |                                       | CTCATCCCCACCCCTTCCACCGG | Chr3:-4475835  | AGCCGTTTCGATTAACGTGGA<br>CTCGCCGTCCATACGATCAA |
|                            |                                       | AGCTTCATCCACCCCTCCTCCGG | Chr1:+3392297  | CGATCTCCCTGCACAGTCTC<br>GAGGAACAAGTCCGGGGAAG  |
|                            |                                       | TTCATGATCCACCCCTCCGCCGG | Chr9:-15283289 | AGATGAAGGATGTGGTGGCG<br>AGAAGTTCAGCATCGAGCCC  |
|                            |                                       | TGCATGAATCTCCCTTCTCCGG  | Chr5:+22744868 | GAACCGACCCATGAACCCAT<br>GGGTGGGGCTCAACAAGTA   |
| <i>cesa9<sub>TMD</sub></i> | CGCCTCGGAGCCGTTGTTGATGG<br>(target 1) | CAGCTCGAACCCGTTGTTGATGG | Chr3:+117633   | GTGCCTGATCGTCTTGGACA<br>GCTCATCCTCAACAGGGTCC  |
|                            |                                       | TGCCTCGGTGTCGTTGTTGACGG | Chr6:+13955149 | TTGTTAGAGTTTGTGTGCG<br>TAATCCTAGTGCTAGTGG     |
|                            |                                       | AGCCCCCGAGCTGTTGTTGAGGG | Chr4:-29228645 | GTGACCCACAGATCCCTT<br>TTCCGAACTAGTCGCAAA      |
|                            |                                       | AGCCCCCGAGCTGTTGTTGAGGG | Chr12:-3048984 | TGCATTTTAGGAGTACCC<br>TATCTCGAGAAGTCAGG       |
|                            |                                       | AGCCCCCGAGCTGTTGTTGAGGG | Chr3:-27750400 | CGCATTTTAGGAGTACCC<br>TATCTCGAGAAGTCAGG       |

|                            |                                       |                         |                |                                                  |
|----------------------------|---------------------------------------|-------------------------|----------------|--------------------------------------------------|
|                            |                                       | AGCCCCCGAGCTGTTGTTGAGGG | Chr3:+13208577 | AGTCTTTGAGGGCGGTTG<br>CTGGGCGTGACATTATCC         |
|                            |                                       | AGCCCCCGAGCTGTTGTTGAGGG | Chr5:+24405896 | GGCCAGAAGAACCCTTAT<br>TAGCCCCGAGTTATCCAA         |
|                            |                                       | AGCCCCCGAGCTGTTGTTGAGGG | Chr8:+21369606 | GTCTTTGAGGGCGGTTGG<br>CTCGGAGTCAGGTGGCTG         |
| <i>cesa9<sub>TMD</sub></i> | TCCCTTCACCATCAAGGCCAGGG<br>(target 2) | ACCCCTCAACATCAAGGCCGGG  | Chr3:+2406173  | GCCTCCATACATGCCCTTCA<br>CGTGGAGCTGTTTGCTCCTA     |
|                            |                                       | TCCATTCACCATGAAGGCAAAGG | Chr7:-17290256 | ACCTCGCTCTCCTCCTCTTT<br>TCTCCGGTGATCGATCTGGT     |
|                            |                                       | TTGCTTCACAATCACGGCCAAGG | Chr5:+20203894 | CCGATTTTCAACTGCGGACC<br>TGTGTTCTTGGAGACCGTCG     |
|                            |                                       | TCCCTTCACTAAAAAGGCAAGGG | Chr1:+38228757 | ACGCTAGCCATTCCAAGACC<br>GCAGCATTGTGAGCTTTGCT     |
|                            |                                       | TCCCGTCACCATGATGGCAACGG | Chr8:+15382715 | ATGGTGAATGAGGTGGGCAG<br>TCGTCGACAGAAGCTCCCTA     |
|                            |                                       | TGCCATCACCATCTAGTCCAAGG | Chr6:+9292546  | GGTGTGAATACTGAATACATCTTGC<br>GTTCAGCACTTGGACCGGA |
|                            |                                       | TCCATTCACCAGGAAGGCAAAGG | Chr1:+15180274 | GAACCTGCCAGTGTCAAAGC<br>TAGTTGGTCGGTTGGTGTGC     |



|                             |                         |                         |                |                                               |
|-----------------------------|-------------------------|-------------------------|----------------|-----------------------------------------------|
| <i>cesa9</i> <sub>ZnF</sub> | GGCGCTCGTACTCGTAGCAGGGG | TGCGCTCGTACTCGTAGCAGGGG | Chr7:+5857909  | GCAAAGCCTTAGCATGACTGT<br>GGTGAGCTGAGAGCTGGTTT |
|                             |                         | TGCGCTCGTACTCGTAGCAAGGG | Chr5:+4570390  | GGCGGCAAAACAATCACAGT<br>CTGATGACGCAGAGGCTGAA  |
|                             |                         | CGCTCTCGTACTCGTAGTAGCGG | Chr11:+3686778 | ATGTCATGTCGCTCGTCCTC<br>AACGACCTTGTGGTGTGAA   |
|                             |                         | GGAGCTCGTTTTCGAAGCAGGGG | Chr6:+18109646 | CGCTGTTTCCTGTTTGTC<br>GGTCCTTCTCTCGCTGAT      |
|                             |                         | GGAGCTCGTTTTCGAAGCAGGGG | Chr7:+15104834 | AGGATATGTTGAGAGCCT<br>CCTACTGAACTTTGTAGAA     |
|                             |                         | GGAGCTCGTTTTCGAAGCAGGGG | Chr4:+10039708 | ATGTGCTTGACTTTGGTG<br>GGTCCTTATCTCGTTGGT      |

**Table S3.** LC-MS/MS identification of *T. reesei*-secreted enzymes after incubation with nanofibers substrate.

| <b>Protein Name</b>              | <b>Accession No.</b> | <b>MW [kDa]</b> | <b>WT-CNF</b> | <b><i>cesa9-TMD</i>-CNF</b> |
|----------------------------------|----------------------|-----------------|---------------|-----------------------------|
| Cellobiohydrolase I              | A0A024RXP8.1         | 54.1            | √             | √                           |
| Cellobiohydrolase II             | A0A024SH76.1         | 49.6            | √             | √                           |
| Endo- $\beta$ -1,4-glucanase I   | A0A024SNB7.1         | 48.2            | √             | √                           |
| Endo- $\beta$ -1,4-glucanase II  | A0A024SH20.1         | 44.1            | √             | √                           |
| Endo- $\beta$ -1,4-glucanase IV  | ETS06300.1           | 35.5            | √             | √                           |
| Endo- $\beta$ -1,4-glucanase VII | A0A024SFJ2           | 26.8            | √             | √                           |
| Endo- $\beta$ -1,4-glucanase     | A0A024SNE0           | 79.8            | √             | √                           |
| Endo-1,3- $\alpha$ -glucosidase  | A0A024SDT8           | 46.6            | √             | √                           |
| $\beta$ -glucosidase             | A0A024SB94           | 84.7            | √             | √                           |
| $\beta$ -glucosidase             | A0A024SD46           | 93.7            | √             | √                           |
| Endo-1,4- $\beta$ -xylanase I    | P36218.1             | 24.6            | √             | √                           |
| Endo-1,4- $\beta$ -xylanase II   | P36217               | 24.1            | √             | √                           |
| Endo-1,4- $\beta$ -xylanase III  | A0A024SIB3           | 38.1            | √             | √                           |
